# Supplementary material for: The Impact of Urban Water Supply Improvements on Infant Enteric Pathogen Infection, Diarrhea, and Growth: Results from the PAASIM Matched Cohort Study
Source: Research Square preprint supplement (doi:10.21203/rs.3.rs-6697339/v1), 2025-07-18
Supplement: Supplementary file 1 [file 790758430c8515ab9de7f6d3.docx]

**Supplemental Table 3.** Joint effect of intervention and direct connection to the water system at the household or compound on primary and additional study outcomes among 12-month-old children enrolled in the PAASIM Study in Beira, Mozambique*.*

|  | **Adjusted Risk**^ **ratio**  **(95% CI)** | **Heterogeneity p-value** |
| --- | --- | --- |
| **Primary Outcomes** |  |  |
| *Prevalence of any bacterial or protozoan pathogen* |  |  |
| Intervention sub-neighborhood, no direct connection | 0·96 (0·88, 1·04) | 0·62 |
| Comparison sub-neighborhood, direct connection | 0·95 (0·87, 1·04) |
| Intervention sub-neighborhood, direct connection | 0·94 (0·86, 1·04) |
| *Prevalence of any bacterial infection* |  |  |
| Intervention sub-neighborhood, no direct connection | 0·98 (0·89, 1·08) | 0·80 |
| Comparison sub-neighborhood, direct connection | 1·00 (0·90, 1·11) |
| Intervention sub-neighborhood, direct connection | 0·96 (0·85, 1·10) |
| *Prevalence of any protozoan pathogen* |  |  |
| Intervention sub-neighborhood, no direct connection | 0·97 (0·74, 1·28) | 0·74 |
| Comparison sub-neighborhood, direct connection | 0·87 (0·64, 1·18) |
| Intervention sub-neighborhood, direct connection | 0·78 (0·56, 1·07) |
| *Any co-infection (bacterial, protozoan, or viral pathogens)* |  |  |
| Intervention sub-neighborhood, no direct connection | 0·94 (0·82, 1·07) | 0·23 |
| Comparison sub-neighborhood, direct connection | 1·02 (0·86, 1·22) |
| Intervention sub-neighborhood, direct connection | 0·82 (0·68, 0·99) |
| **Secondary outcomes** |  |  |
| *Any virus* |  |  |
| Intervention sub-neighborhood, no direct connection | 0·93 (0·71, 1·23) | 0·61 |
| Comparison sub-neighborhood, direct connection | 0·82 (0·59, 1·15) |
| Intervention sub-neighborhood, direct connection | 0·68 (0·45, 1·02) |
| *Diarrhea (1-week period prevalence)* |  |  |
| Intervention sub-neighborhood, no direct connection | 0·88 (0·68, 1·14) | 0·20 |
| Comparison sub-neighborhood, direct connection | 0·83 (0·63, 1·11) |
| Intervention sub-neighborhood, direct connection | 0·96 (0·75, 1·22) |
| *Stunting* |  |  |
| Intervention sub-neighborhood, no direct connection | 1·07 (0·68, 1·69) | 0·83 |
| Comparison sub-neighborhood, direct connection | 0·63 (0·28, 1·45) |
| Intervention sub-neighborhood, direct connection | 0·76 (0·47, 1·22) |
| *Underweight* |  |  |
| Intervention sub-neighborhood, no direct connection | 1·18 (0·45, 3·10) | 0·68 |
| Comparison sub-neighborhood, direct connection | 0·65 (0·28, 1·52) |
| Intervention sub-neighborhood, direct connection | 0·98 (0·29, 3·26) |
| *Campylobacter* |  |  |
| Intervention sub-neighborhood, no direct connection | 0·97 (0·68, 1·37) | 0·37 |
| Comparison sub-neighborhood, direct connection | 1·11 (0·79, 1·55) |
| Intervention sub-neighborhood, direct connection | 0·81 (0·51, 1·28) |
| *EAEC* |  |  |
| Intervention sub-neighborhood, no direct connection | 0·79 (0·64, 0·98) | 0·53 |
| Comparison sub-neighborhood, direct connection | 1·11 (0·86, 1·43) |
| Intervention sub-neighborhood, direct connection | 0·78 (0·59, 1·04) |
| *DAEC* |  |  |
| Intervention sub-neighborhood, no direct connection | 1·07 (0·95, 1·20) | 0·81 |
| Comparison sub-neighborhood, direct connection | 1·05 (0·90, 1·21) |
| Intervention sub-neighborhood, direct connection | 1·14 (1·01, 1·29) |
| *tEPEC* |  |  |
| Intervention sub-neighborhood, no direct connection | 0·75 (0·48, 1·19) | 0·08 |
| Comparison sub-neighborhood, direct connection | 0·74 (0·43, 1·27) |
| Intervention sub-neighborhood, direct connection | 1·07 (0·75, 1·53) |
| *aEPEC* |  |  |
| Intervention sub-neighborhood, no direct connection | 0·93 (0·68, 1·27) | 0·80 |
| Comparison sub-neighborhood, direct connection | 1·07 (0·78, 1·46) |
| Intervention sub-neighborhood, direct connection | 0·93 (0·70, 1·25) |
| *ETEC* |  |  |
| Intervention sub-neighborhood, no direct connection | 0·83 (0·50, 1·38) | 0·54 |
| Comparison sub-neighborhood, direct connection | 0·50 (0·28, 0·91) |
| Intervention sub-neighborhood, direct connection | 0·54 (0·27, 1·09) |
| *EIEC/Shigella* |  |  |
| Intervention sub-neighborhood, no direct connection | 1·4 (0·88, 2·21) | 0·01 |
| Comparison sub-neighborhood, direct connection | 1·84 (1·07, 3·15) |
| Intervention sub-neighborhood, direct connection | 0·72 (0·33, 1·56) |
| *C. difficile* |  |  |
| Intervention sub-neighborhood, no direct connection | 0·61 (0·27, 1·36) | 0·60 |
| Comparison sub-neighborhood, direct connection | 1·46 (0·76, 2·83) |
| Intervention sub-neighborhood, direct connection | 1·21 (0·61, 2·38) |
| *Rotavirus* |  |  |
| Intervention sub-neighborhood, no direct connection | 0·77 (0·33, 1·76) | 0·82 |
| Comparison sub-neighborhood, direct connection | 0·67 (0·29, 1·55) |
| Intervention sub-neighborhood, direct connection | 0·59 (0·23, 1·55) |
| *Adenovirus* |  |  |
| Intervention sub-neighborhood, no direct connection | 0·81 (0·30, 2·19) | 0·69 |
| Comparison sub-neighborhood, direct connection | 1·38 (0·55, 3·51) |
| Intervention sub-neighborhood, direct connection | 0·77 (0·20, 2·93) |
| *Norovirus* |  |  |
| Intervention sub-neighborhood, no direct connection | 0·69 (0·40, 1·18) | 0·28 |
| Comparison sub-neighborhood, direct connection | 0·45 (0·24, 0·85) |
| Intervention sub-neighborhood, direct connection | 0·51 (0·27, 0·97) |
| *Sapovirus* |  |  |
| Intervention sub-neighborhood, no direct connection | 1·00 (0·63, 1·60) | 0·60 |
| Comparison sub-neighborhood, direct connection | 1·00 (0·58, 1·74) |
| Intervention sub-neighborhood, direct connection | 0·78 (0·42, 1·45) |
| *Giardia* |  |  |
| Intervention sub-neighborhood, no direct connection | 1·33 (0·86, 2·07) | 0·33 |
| Comparison sub-neighborhood, direct connection | 0·84 (0·55, 1·30) |
| Intervention sub-neighborhood, direct connection | 0·76 (0·41, 1·42) |
| *Cryptosporidium* |  |  |
| Intervention sub-neighborhood, no direct connection | 0·62 (0·36, 1·09) | 0·72 |
| Comparison sub-neighborhood, direct connection | 0·97 (0·68, 1·37) |
| Intervention sub-neighborhood, direct connection | 0·68 (0·41, 1·12) |
|  | **Adjusted ß (95% CI)** | **Adjusted p-value** |
| *Pathogen count* |  |  |
| Intervention sub-neighborhood, no direct connection | -0·13 (-0·34, 0·08) | 0·38 |
| Comparison sub-neighborhood, direct connection | 0·02 (-0·27, 0·32) |
| Intervention sub-neighborhood, direct connection | -0·26 (-0·48, -0·05) |
| *LAZ* |  |  |
| Intervention sub-neighborhood, no direct connection | 0·04 (-0·30, 0·37) | 0·70 |
| Comparison sub-neighborhood, direct connection | 0·01 (-0·36, 0·54) |
| Intervention sub-neighborhood, direct connection | 0·01 (-0·34, 0·37) |
| *WAZ* |  |  |
| Intervention sub-neighborhood, no direct connection | -0·14 (-0·42, 0·15) | 0·36 |
| Comparison sub-neighborhood, direct connection | 0·12 (-0·20, 0·44) |
| Intervention sub-neighborhood, direct connection | 0·17 (-0·17, 0·52) |

^The referent category for this table is always comparison sub-neighborhood, no direct connection. Any helminth, Salmonella, EHEC, E· coli O157, V· cholerae, Astrovirus, Trichuris, Cyclospora, Ancyclostoma dudenale, Necator americanus, Entamoeba histolytica, and STEC all did not run due to low or zero cell counts.
