# Supplementary material for: The Impact of Urban Water Supply Improvements on Infant Enteric Pathogen Infection, Diarrhea, and Growth: Results from the PAASIM Matched Cohort Study
Source: Research Square preprint supplement (doi:10.21203/rs.3.rs-6697339/v1), 2025-07-18
Supplement: Supplementary file 2 [file ad781ceaf4abdf421d10d540.docx]

**PAASIM Authorship Group/ Grupo do Autoria PAASIM:**

Principal Investigators/Investigadores Responsáveis

Karen Levy1, Matthew C. Freeman2, Rassul Nalá3

Co-Investigators/ Co-Investigadores

Joe Brown4, Thomas Clasen2, Josh Garn5, Konstantinos T. Konstantinidis6, João Luis Manuel7, Magalhães Miguel Mangamela8, Lance Waller9

Field coordination and data management subgroup/ Subgrupo de coordenação de campo e gestão de dados

Veronica Casmo,3 Christine S. Fagnant-Sperati1, Sydney Hubbard2, Antonio Junior10, Rebecca Kann1, Joaquim Lequechane7, Sandra McGunnegil2, Molly Miller-Petrie1, Lilly O’Brien2, Jedidiah S. Snyder2, Courtney Victor2

Field data collection subgroup/Subgrupo de recolha de dados de campo

Zaida Adriano, Maria Sonia Airone, Genifa Banze, Isabel Chiquele​, Ivânia Cossa, Marcelo Fernandes​, Ligia Jorge​, Gerson de Melo, Bacelar Muname, Mario Mungoi [deceased], Avelina José Sambo​, Ricardina Timoteo​,

Water quality analysis subgroup/Subgrupo de análise da qualidade da água

Helena do Rosário Cipriano​, Arnaldo Amenosse Cumbana​, Ilídio Daniel Dava​, Eunice Maria Cláver Dias​, Christine S. Fagnant-Sperati1, José Coma Fraquesa​, Sydney Hubbard2, Yarrow Linden4, Ginate Budane Mepimba​, Aniceto Mendes Calisto Lourenço Muailime​, Rufino Marcos Sebastião, Nicolette Zhou​1

TAC enteric pathogen data subgroup/Subgrupo de dados de patógenos entéricos TAC

Toheedat Bahara4, Christine S. Fagnant-Sperati1, Erin Kowalsky4, Amanda Lai4, Courtney Victor2, Nicolette Zhou1

1 University of Washington, Department of Environmental and Occupational Health Sciences, Seattle, WA, USA

2 Emory University, Rollins School of Public Health, Gangarosa Department of Environmental Health, Atlanta, Georgia, USA

3 Instituto Nacional de Saude, Marracuene, Mozambique

4 University of North Carolina, Gillings School of Public Health, Department of Environmental Sciences and Engineering, Chapel Hilll, NC, USA

5 University of Nevada Reno, School of Public Health, Reno, NV, USA

6 Georgia Institute of Technology, School of Civil & Environmental Engineering, Atlanta, GA, USA

7 Beira Operations Research Center, Beira, Mozambique

8 AURA, IP, Maputo, Mozambique

9 Emory University, Rollins School of Public Health, Department of Biostatistics, Atlanta, Georgia, USA

10 WeConsult, Maputo, Mozambique
