# Supplementary material for: The Impact of Urban Water Supply Improvements on Infant Enteric Pathogen Infection, Diarrhea, and Growth: Results from the PAASIM Matched Cohort Study
Source: Research Square preprint supplement (doi:10.21203/rs.3.rs-6697339/v1), 2025-07-18
Supplement: Supplementary file 3 [file b14e2520e99b087175f7a438.docx]

**Supplemental Table 2.** Characteristics of study participants of the PAASIM Study in Beira, Mozambique at enrollment or at the first study visit after birth of the index child, stratified by each level of combined intervention status.

|  | **Intervention sub-neighborhood, No direct connection (N=175)** | **Comparison sub-neighborhood, No direct connection**  **(N=210)** | **Comparison sub-neighborhood, direct connection (N=93)** | **Intervention sub-neighborhood, direct connection (N=122)** |
| --- | --- | --- | --- | --- |
| Household demographics |  |  |  |  |
| Number of children under 5 in HH | 0·7 (0·7) | 0·75 (0·8) | 0·58 (0·8) | 0·80 (0·9) |
| Number of people living in HH | 4·5 (1·9) | 4·52 (2·1) | 5·39 (2·8) | 5·94 (2·7) |
| Months living in HH | 65·3 (86·5) | 50·59 (63·9) | 71·15 (87·6) | 100·07 (114·3) |
| High poverty | 92 (52·6%) | 117 (55·7%) | 30 (32·3%) | 45 (36·9%) |
| Fixed employment of primary wage earner | 48 (27·4%) | 75 (35·7%) | 51 (54·8%) | 44 (36·1%) |
| Secondary education of primary caregiver complete | 30 (17·1%) | 23 (11·0%) | 33 (35·5%) | 45 (36·9%) |
| Pregnancy and child-related measures |  |  |  |  |
| Maternal age (yrs) | 25·30 (5·5) | 25·83 (5·1) | 27·31 (6·3) | 26·11 (5·6) |
| Child Sex (Female) | 88 (50·3%) | 104 (49·5%) | 41 (44·1%) | 61 (50·0%) |
| Previous births (binary) | 142 (81·1%) | 175 (83·3%) | 70 (75·3%) | 95 (77·9%) |
| Attended post-natal care | 166 (94·89%) | 187 (89·5%) | 85 (91·4%) | 116 (95·1%) |
| Child birthweight (g) | 3104·6 (432·6) | 3068·24 (454·8) | 3236·77 (513·7) | 3137·81 (497·8) |
| Cesarean section birth | 18 (10·3%) | 14 (6·7%) | 13 (14·1%) | 10 (8·3%) |
| Child exclusively breastfed (3 months) | 54 (30·9%) | 72 (34·3%) | 27 (29·0%) | 29 (23·8%) |
| Climate and WASH parameters |  |  |  |  |
| Data collected during rainy season (Dec-Apr) | 92 (52·6%) | 103 (49·1%) | 45 (48·4%) | 59 (48·4%) |
| Any flooding in the HH or yard in the last month | 63 (36·2%) | 76 (36·5%) | 26 (28·3%) | 27 (22·1%) |
| Handwashing station (with soap and water) in house or yard | 47 (26·9%) | 40 (19·1%) | 36 (38·7%) | 53 (43·4%) |
| Observed human feces in or near the HH | 2 (1·1%) | 1 (0·5%) | 0 (0·0%) | 1 (0·8%) |
| Observed animal feces in or near the HH | 16 (9·1%) | 16 (7·6%) | 9 (9·7%) | 18 (14·8%) |
| Household Food Insecurity Access Scale | 10·2 (6·8) | 10·49 (7·4) | 9·19 (6·7) | 9·70 (6·6) |
| Basic sanitation access | 44 (25·1%) | 62 (29·5%) | 45 (48·4%) | 67 (54·9%) |

Data are n (%) and mean (SD)
