# Supplementary material for: The Impact of Urban Water Supply Improvements on Infant Enteric Pathogen Infection, Diarrhea, and Growth: Results from the PAASIM Matched Cohort Study
Source: Research Square preprint supplement (doi:10.21203/rs.3.rs-6697339/v1), 2025-07-18
Supplement: Supplementary file 4 [file eaf9cbd48fe8e494e522edfc.docx]

**Supplemental Table 1.** Impact of the intervention on primary health outcomes disaggregated by sex among enrolled in the PAASIM Study in Beira, Mozambique

|  | **Female children (N=289)** | | | **Male children (N= 311)** | | |
| --- | --- | --- | --- | --- | --- | --- |
| **Primary outcomes** | **Comparison**  **(N=140)** | **Intervention**  **(N=149)** | **Adjusted RR**  **(95% CI)** | **Comparison**  **(N=163)** | **Intervention**  **(N=148)** | **Adjusted RR**  **(95% CI)** |
| Prevalence of any bacterial or protozoan pathogen | 124 (89%) | 122 (82%) | 0·96 (0·88, 1·05) | 139 (85·28) | 120 (81·08) | 0·95 (0·86, 1·05) |
| Prevalence of any bacterial infection | 116 (83%) | 112 (75%) | 0·96 (0·86, 1·08) | 124 (76·07) | 110 (74·32) | 0·96 (0·84, 1·09) |
| Prevalence of any protozoan pathogen | 47 (34%) | 41 (28%) | 0·96 (0·68, 1·35) | 58 (35·58) | 43 (29·05) | 0·94 (0·68, 1·32) |
| Any co-infection (bacterial, protozoan, or viral pathogens)a | 99 (71%) | 80 (54%) | 0·78 (0·64, 0·94) | 97 (59·51) | 89 (60·14) | 0·97 (0·82, 1·14) |

Data reported are n (%). aThere was significant interaction by child sex on the relationship between intervention and any co-infection (p=0·03).
