# Supplementary figures and images for: The Impact of Urban Water Supply Improvements on Infant Enteric Pathogen Infection, Diarrhea, and Growth: Results from the PAASIM Matched Cohort Study
Source: Research Square preprint supplement (doi:10.21203/rs.3.rs-6697339/v1), 2025-07-18

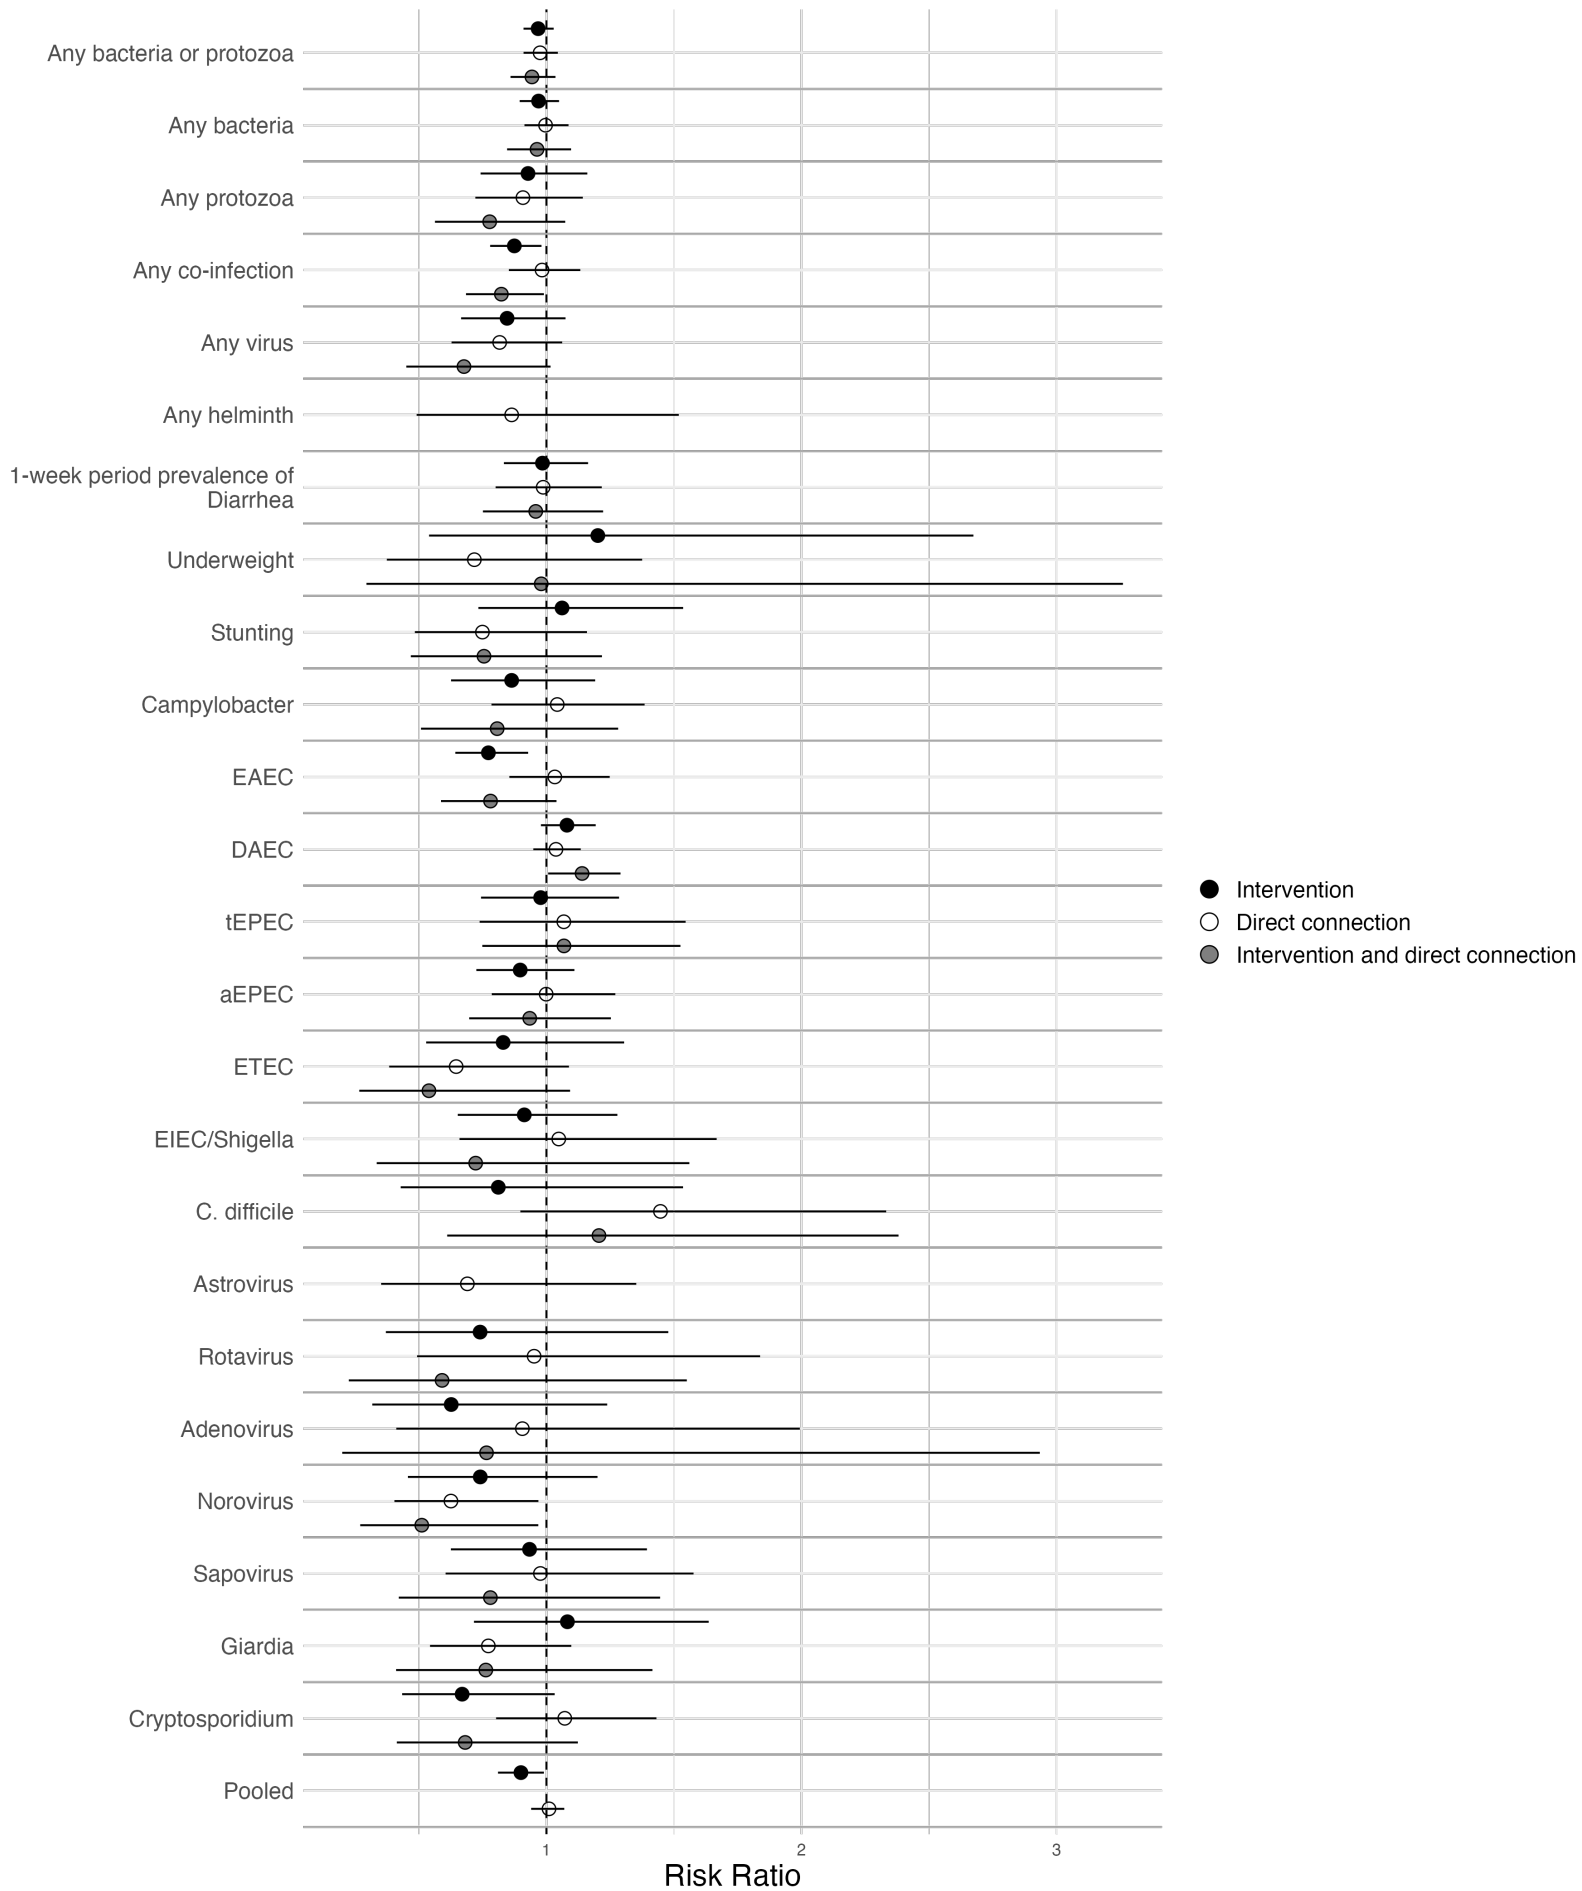

Supplement: Supplementary file 1 [file 3322b4d61f98a3ef4c800bf8.pdf]
